# Supplementary material
Source: PubMed Central journal article supplement (PMC10288886)
Supplement: NIHMS1907204-supplement-Supplementary_Material.pdf [file NIHMS1907204-supplement-Supplementary_Material.pdf]

## Supporting Information

### **Pain Chemogenomics Knowledgebase (Pain-CKB) for Systems Pharmacology Target Mapping and PBPK Modeling Investigation of Opioid Drug-Drug Interactions**

**Mingzhe Shen<sup>1,#</sup>, Maozi Chen<sup>1,#</sup>, Tianjian Liang<sup>1</sup>, Siyi Wang<sup>1</sup>, Ying Xue<sup>2</sup>,**

**Richard Bertz<sup>1,\*</sup>, Xiang-Qun Xie<sup>1,\*</sup>, Zhiwei Feng<sup>1,\*</sup>**

<sup>1</sup>Department of Pharmaceutical Sciences and Computational Chemical Genomics Screening Center, School of Pharmacy; National Center of Excellence for Computational Drug Abuse Research; Drug Discovery Institute; Departments of Computational Biology and Structural Biology, School of Medicine, University of Pittsburgh, Pittsburgh, Pennsylvania 15261, United States

<sup>2</sup>Department of Pharmacy and Therapeutics, School of Pharmacy, University of Pittsburgh, Pittsburgh, PA 15261, USA

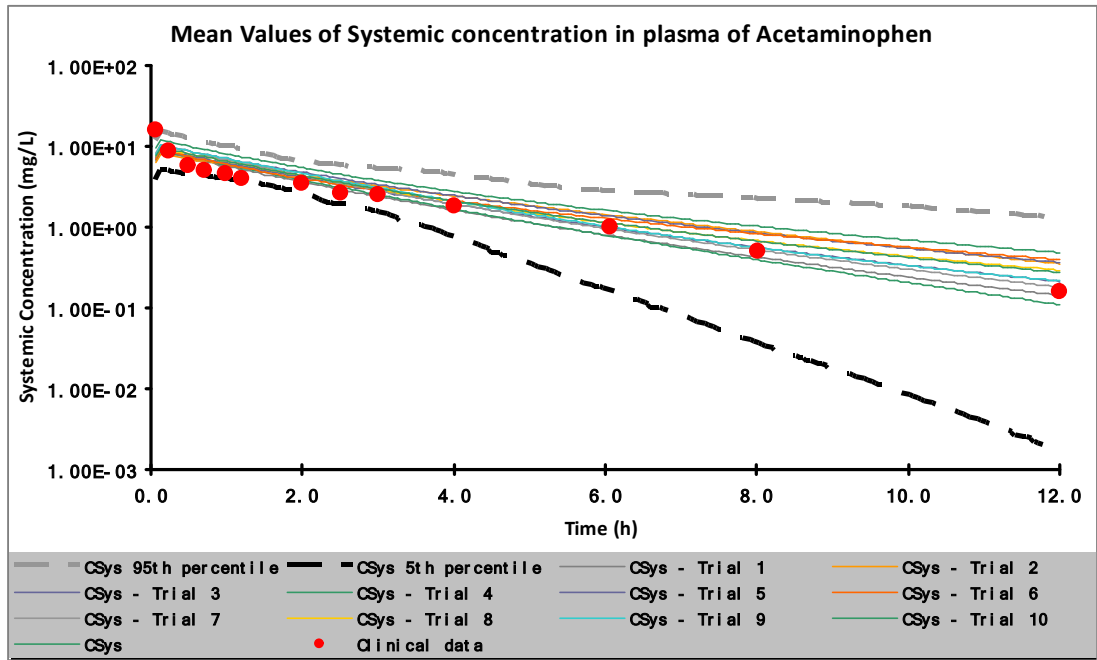

**Figure S1. Observed and simulated concentration–time profiles of acetaminophen 650 mg iv infusion over 5 min.** The simulated results were generated using 10 trials of 10 virtual healthy volunteers. Observed data<sup>1</sup> were highlighted in red dots while the simulated results, mean value, and the 95th/5th percentile of the simulation were shown by corresponding lines.

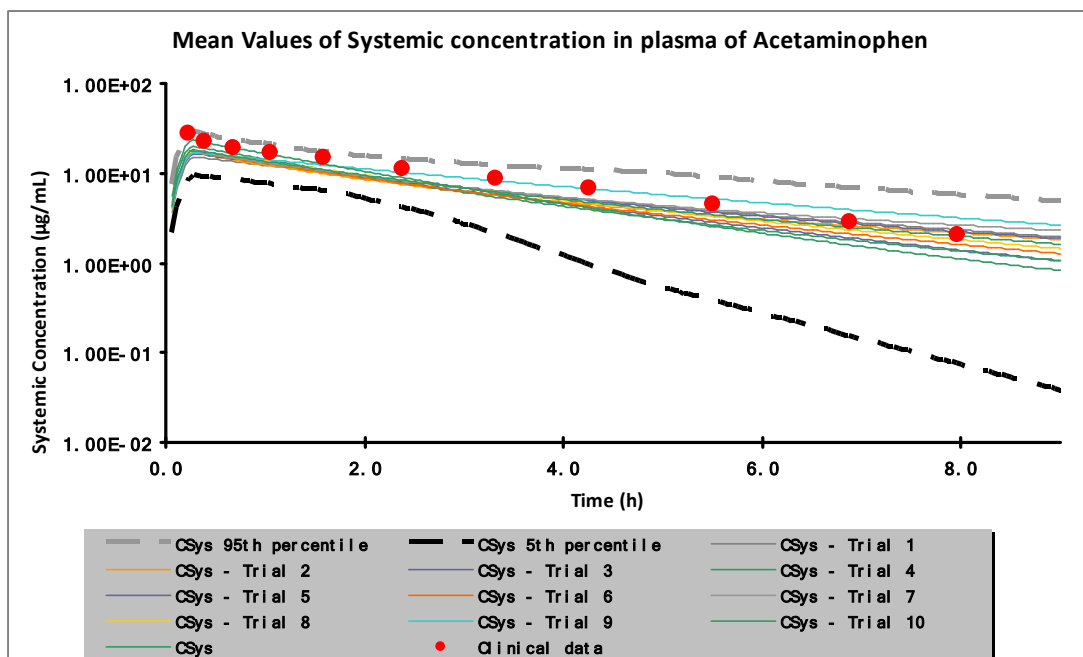

**Figure S2. Observed and simulated concentration–time profiles of acetaminophen 1000 mg iv infusion over 15 min.** The simulated results were generated using 10 trials of 10 virtual healthy Japanese volunteers. Observed data<sup>2</sup> were highlighted in red dots while the simulated results, mean value, and the 95th/5th percentile of the simulation were shown by corresponding lines.

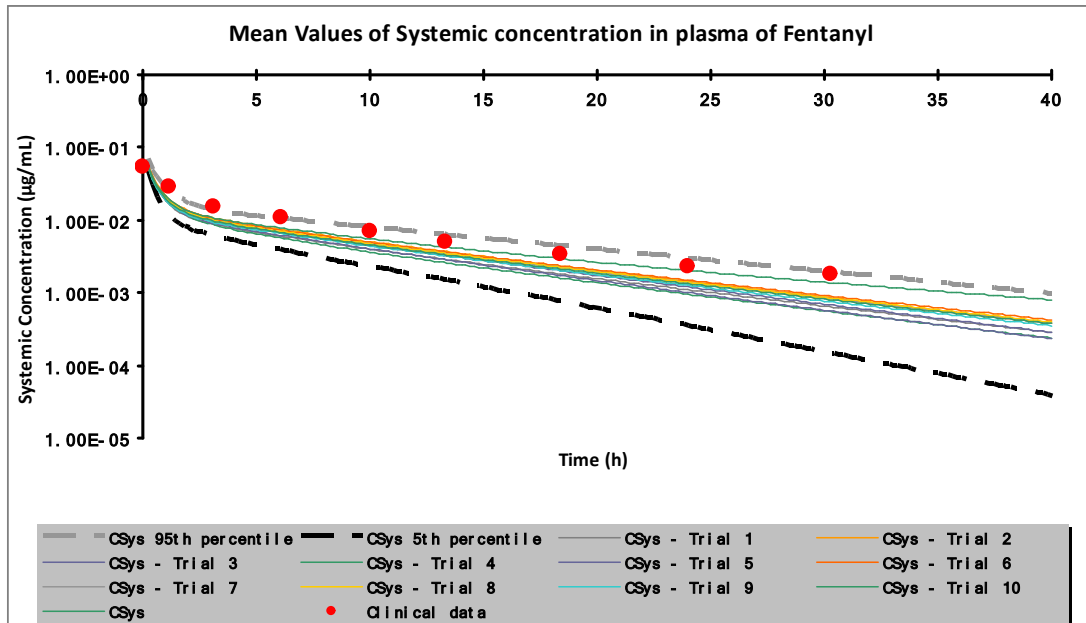

**Figure S3. Observed and simulated concentration–time profiles of fentanyl 100 µg/kg iv bolus.** The simulated results were generated using 10 trials of 10 virtual healthy volunteers. Observed data<sup>3</sup> were highlighted in red dots while the simulated results, mean value, and the 95th/5th percentile of the simulation were shown by corresponding lines.

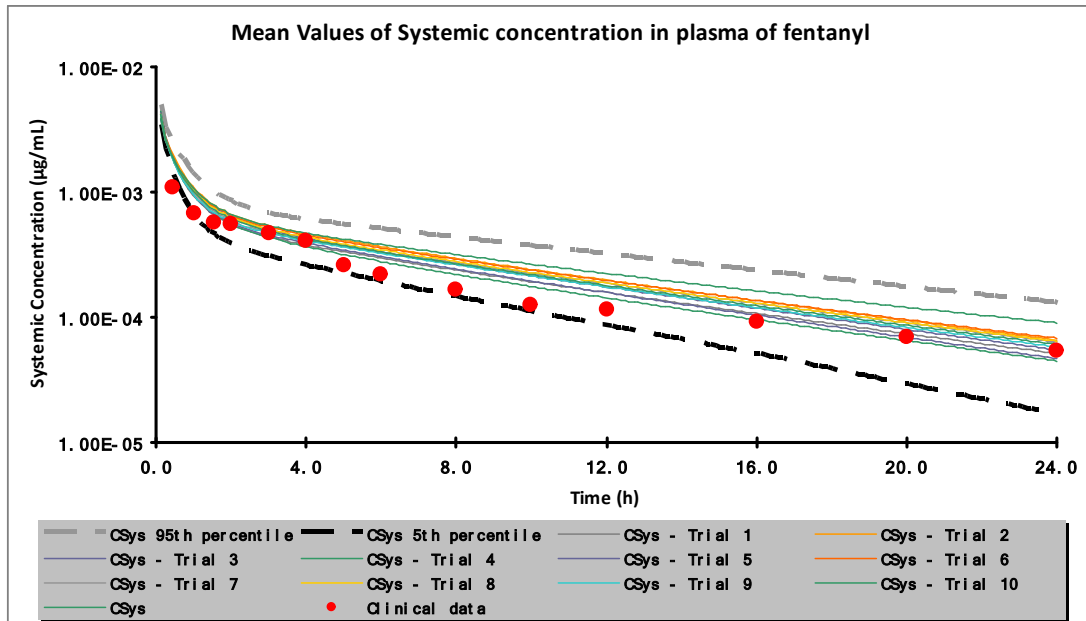

**Figure S4. Observed and simulated concentration–time profiles of fentanyl 5 µg/kg iv bolus.** The simulated results were generated using 10 trials of 10 virtual healthy volunteers. Observed data<sup>4</sup> were highlighted in red dots while the simulated results, mean value, and the 95th/5th percentile of the simulation were shown by corresponding lines.

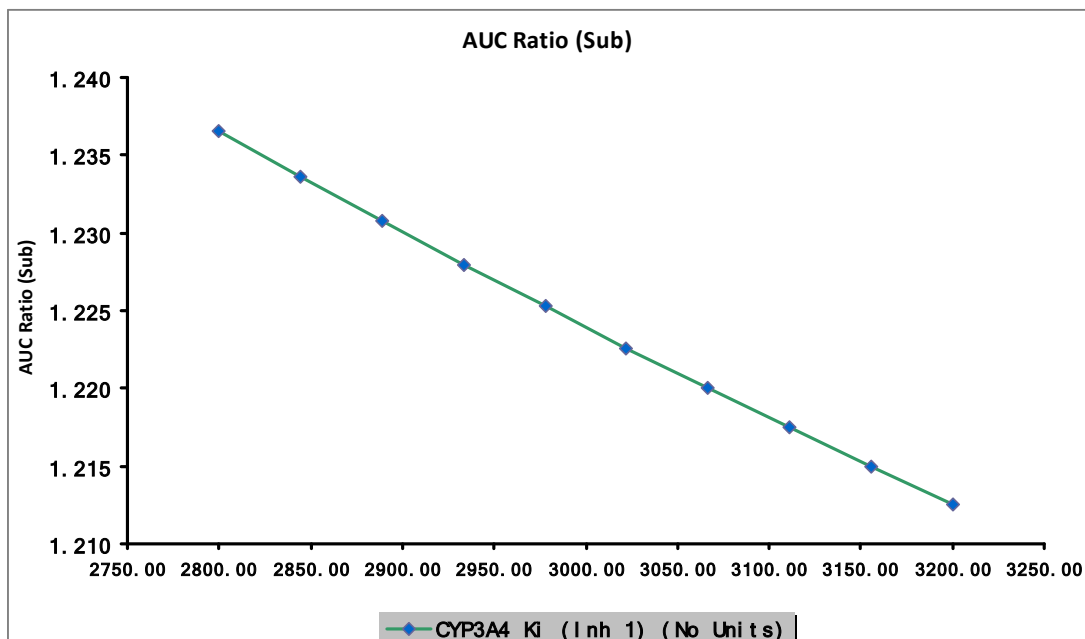

**Figure S5.** The AUC Ratio of fentanyl with acetaminophen when Ki value is ranged in 2800-3200  $\mu\text{M}$ . The dosage of fentanyl and acetaminophen (inhibition substrate) is 0.003 mg/kg and 80000 mg.

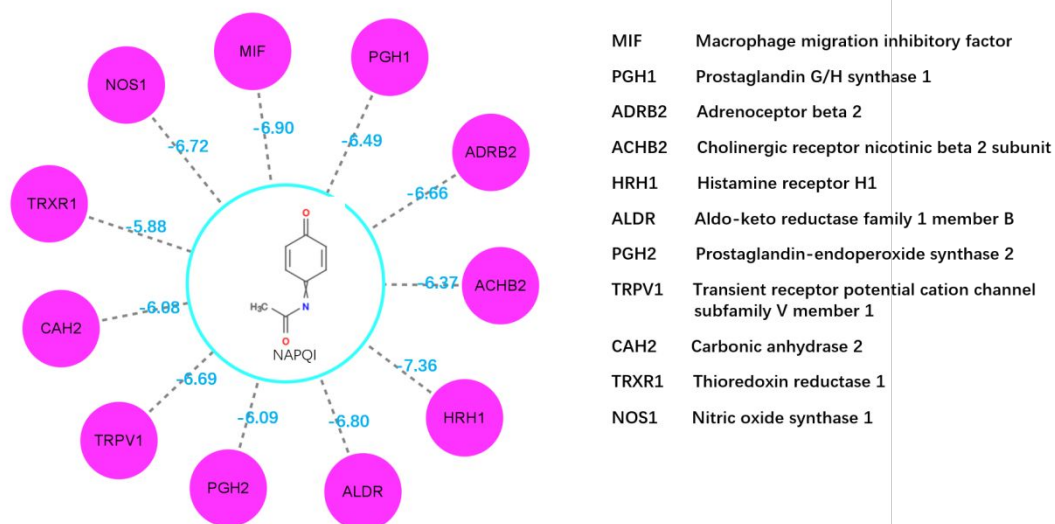

|       |                                                                  |
|-------|------------------------------------------------------------------|
| MIF   | Macrophage migration inhibitory factor                           |
| PGH1  | Prostaglandin G/H synthase 1                                     |
| ADRB2 | Adrenoceptor beta 2                                              |
| ACHB2 | Cholinergic receptor nicotinic beta 2 subunit                    |
| HRH1  | Histamine receptor H1                                            |
| ALDR  | Aldo-keto reductase family 1 member B                            |
| PGH2  | Prostaglandin-endoperoxide synthase 2                            |
| TRPV1 | Transient receptor potential cation channel subfamily V member 1 |
| CAH2  | Carbonic anhydrase 2                                             |
| TRXR1 | Thioredoxin reductase 1                                          |
| NOS1  | Nitric oxide synthase 1                                          |

**Figure S6. Computational systems pharmacology-target mapping (CSP-Target Mapping) for NAPQI.** The purple dots and dashed lines represent the predicted targets and interaction. Our algorithm predicted NAPQI may bind to TrxR.

## References

1. Scavone, J. M., Greenblatt, D. J., Blyden, G. T., Luna, B. G., and Harmatz, J. S. (1990) Validity of a Two-Point Acetaminophen Pharmacokinetic Study, *Ther. Drug Monit.* 12, 35-39.
2. Imaizumi, T., Obara, S., Mogami, M., Iseki, Y., Hasegawa, M., and Murakawa, M. (2017) Population pharmacokinetics of intravenous acetaminophen in Japanese patients undergoing elective surgery, *J. Anesth.* 31, 1-9.
3. Brusset, A., Levron, D. J. C., Olivier, P., Schlumberger, S., Moing, J. P. L., Dubois, C., Guilmet, D., Valide, L., Guenoun, T., and Fischler, M. (1999) Comparative Pharmacokinetic Study of Fentanyl and Sufentanil after Single High-Bolus Doses, *Clin. Drug Invest.* 18, 377-389.
4. Saari, T. I., Laine, K., Neuvonen, M., Neuvonen, P. J., and Olkkola, K. T. (2008) Effect of voriconazole and fluconazole on the pharmacokinetics of intravenous fentanyl, *Eur. J. Clin. Pharmacol.* 64, 25-30.
